# Supplementary material for: Psychosocial recommendations for the care of children and adults with epidermolysis bullosa and their family: evidence based guidelines
Source: Springer Nature journal article supplement (doi:10.1186/s13023-019-1086-5), 2019-06-11
Supplement: MOESM1 [file 16797238]

Psychosocial CPG: Appendix 1

| CPG working Panel |                   |                                                         |                         |             |               |          |                                |                   |                        |                        |         |              |                                      |                                          |                    |
|-------------------|-------------------|---------------------------------------------------------|-------------------------|-------------|---------------|----------|--------------------------------|-------------------|------------------------|------------------------|---------|--------------|--------------------------------------|------------------------------------------|--------------------|
| Panel member      | Country of origin | Speciality with EB                                      | Role in panel           | Focus group | First meeting | Searches | Paper filtration and Appraisal | Outcome summaries | Recommendation meeting | Recommendation Summary | Writing | Panel Review | Incorporation of feedback from panel | Incorporation of feedback from reviewers | Submitting the CPG |
| K Martin          | UK                | Senior Clinical Psychologist, adults and families       | Chair                   |             | ✓             | ✓        | ✓                              | ✓                 | ✓                      | ✓                      | ✓       | ✓            | ✓                                    | ✓                                        | ✓                  |
| S Geuens          | Belgium           | Clinical Psychologist, adults and paediatrics           | Co-Chair                |             | ✓             | ✓        | ✓                              | ✓                 | ✓                      | ✓                      | ✓       | ✓            | ✓                                    | ✓                                        | ✓                  |
| J K Asche         | Norway            | Person living with EB                                   | PPI Member              | ✓           | ✓             | ✓        | ✓                              | ✓                 | ✓                      |                        |         | ✓            |                                      | * Col                                    |                    |
| R Bodan           | USA               | Person living with EB                                   | PPI Member              |             |               | ✓        | ✓                              | ✓                 | ✓                      |                        |         | ✓            | ✓                                    |                                          |                    |
| F Browne          | Ireland           | Dermatologist                                           | Member                  |             |               | ✓        | ✓                              | ✓                 | ✓                      |                        |         | ✓            | ✓                                    |                                          |                    |
| A Downe           | UK                | EB CNS                                                  | Member                  |             |               | ✓        | ✓                              | ✓                 | ✓                      |                        |         | ✓            | ✓                                    | ✓                                        |                    |
| N Garcia Garcia   | Spain             | Community Psychologist                                  | Member                  | ✓           | ✓             | ✓        | ✓                              | ✓                 | ✓                      |                        |         | ✓            |                                      |                                          |                    |
| G Jaega           | UK                | Person living with EB                                   | PPI Member              |             | ✓             | ✓        | ✓                              | ✓                 | ✓                      |                        |         |              |                                      |                                          |                    |
| B Kennedy         | Ireland           | Senior clinical psychologist, paediatrics               | Member                  |             | ✓             | ✓        | ✓                              | ✓                 | ✓                      |                        |         | ✓            | ✓                                    | ✓                                        |                    |
| P J Mauritz       | Netherlands       | Child Development Therapist                             | Member                  | ✓           | ✓             | ✓        | ✓                              | ✓                 | ✓                      |                        |         | ✓            | ✓                                    | ✓                                        |                    |
| F Perez           | Chile             | Community Psychologist                                  | Member                  |             |               |          | ✓                              | ✓                 | ✓                      |                        |         | ✓            | ✓                                    |                                          |                    |
| K Soon            | UK                | Clinical Psychologist, paediatrics                      | Member                  |             | ✓             | ✓        | ✓                              | ✓                 | ✓                      |                        |         |              |                                      |                                          |                    |
| V Zmazek          | Croatia           | Person living with EB                                   | PPI Member              |             | ✓             | ✓        | ✓                              | ✓                 | ✓                      |                        |         |              |                                      |                                          |                    |
| K Mayre-Chilton   | UK                | DI CPG coordinator, Specialist adult research dietitian | Project manager/ Member | ✓           | ✓             | ✓        | ✓                              | ✓                 | ✓                      | ✓                      | ✓       | ✓            | ✓                                    | * Col                                    | ✓                  |

**Key:** UK- United Kingdom; USA- United States of America; EB- Epidermolysis bullosa; CNS- EB Clinical Nurse Specialist; DI- DEBRA International; PPI- Patient and Public involved (People living with EB); Col- Conflict of interest; ✓- involved in this development step; \* - not involved in this

| Reviewer Panel List |             |                                            |  |  |  |  |  |  |  |  |  |  |  |  |  |
|---------------------|-------------|--------------------------------------------|--|--|--|--|--|--|--|--|--|--|--|--|--|
| K Moss              | UK          | Psychoanalytic psychotherapist with Adults |  |  |  |  |  |  |  |  |  |  |  |  |  |
| S Butterworth       | UK          | Regional Community Support                 |  |  |  |  |  |  |  |  |  |  |  |  |  |
| G Gößnitzer         | Austria     | Psychologist                               |  |  |  |  |  |  |  |  |  |  |  |  |  |
| J Finnigan          | New Zealand | EB CNS                                     |  |  |  |  |  |  |  |  |  |  |  |  |  |
| S Cassidy           | New Zealand | EB CNS                                     |  |  |  |  |  |  |  |  |  |  |  |  |  |
| K Begum             | UK          | EB CNS                                     |  |  |  |  |  |  |  |  |  |  |  |  |  |
| A King              | USA         | Occupational Therapist lead                |  |  |  |  |  |  |  |  |  |  |  |  |  |
| M Zmazek            | Croatia     | Person living with EB                      |  |  |  |  |  |  |  |  |  |  |  |  |  |

**Key:** UK- United Kingdom; EB- Epidermolysis bullosa; CNS- EB Clinical Nurse Specialist; GST- Guy's and St Thomas' Hospitals NHS Foundation Trust; BCH- Birmingham Children's Hospital; HoE- Heart of England Foundation Trust, Solihull Hospital; Col- Conflict of interest; ✓ Expert presenter at the First panel meeting; \* Panel members who has to resign their roles due to work commitments and requested to support
