# Supplementary material for: Psychosocial recommendations for the care of children and adults with epidermolysis bullosa and their family: evidence based guidelines
Source: Springer Nature journal article supplement (doi:10.1186/s13023-019-1086-5), 2019-06-11
Supplement: MOESM3 [file 16797238]

## Psychosocial Guidelines: Appendix 3

### CPG Evaluation Form: Pre implementation

Please answer the questions below to help us evaluate the usefulness and effectiveness of our guidelines, as well as learn more about those using the information contained in the publication.

| <b>Section A: General Information</b>                                                                                   |                                                                                                                                                                                                                                                                                                                                                        |                                                                                                                                                                                                                                       |                                                                                           |
|-------------------------------------------------------------------------------------------------------------------------|--------------------------------------------------------------------------------------------------------------------------------------------------------------------------------------------------------------------------------------------------------------------------------------------------------------------------------------------------------|---------------------------------------------------------------------------------------------------------------------------------------------------------------------------------------------------------------------------------------|-------------------------------------------------------------------------------------------|
| <b>How did you hear about this guideline?</b><br><i>Please tick all that apply and provide details where applicable</i> | <input type="checkbox"/> Journal searches (e.g. PubMed)<br><input type="checkbox"/> Event (e.g. DEBRA conference, EB study day)<br><input type="checkbox"/> Recommendation (e.g. family member, clinician)<br><input type="checkbox"/> DEBRA communication (e.g. newsletter, website, social media)<br><input type="checkbox"/> Other (please specify) |                                                                                                                                                                                                                                       |                                                                                           |
| <b>Why have you chosen to review this guideline?</b>                                                                    |                                                                                                                                                                                                                                                                                                                                                        |                                                                                                                                                                                                                                       |                                                                                           |
| <b>City and country:</b><br><i>Residence</i>                                                                            |                                                                                                                                                                                                                                                                                                                                                        |                                                                                                                                                                                                                                       |                                                                                           |
| <b>DEBRA group affiliation:</b><br><i>If applicable</i>                                                                 |                                                                                                                                                                                                                                                                                                                                                        |                                                                                                                                                                                                                                       |                                                                                           |
| <b>Which of the following best describes you?</b><br><i>Please tick all that apply</i>                                  | <b>Group A</b><br><i>Professionals</i><br><input type="checkbox"/> Clinician<br><input type="checkbox"/> Allied health professional<br><input type="checkbox"/> Professional carer                                                                                                                                                                     | <b>Group B</b><br><i>Non-professionals</i><br><input type="checkbox"/> Person living with EB<br><input type="checkbox"/> *Caregiver (family member)<br><input type="checkbox"/> Caregiver (friend)<br><input type="checkbox"/> Friend | <b>Group C</b><br><i>Other</i><br><input type="checkbox"/> Other (please provide details) |
|                                                                                                                         | <i>Please continue with Section B</i>                                                                                                                                                                                                                                                                                                                  | <i>Please continue with Section C</i>                                                                                                                                                                                                 | <i>Please continue with Section B or C (as appropriate)</i>                               |

| <b>Section B: Professionals</b>                                                                                  |                                                                                                                                                            |
|------------------------------------------------------------------------------------------------------------------|------------------------------------------------------------------------------------------------------------------------------------------------------------|
| <b>Your institute:</b><br><i>Name and address (including country)</i>                                            |                                                                                                                                                            |
| <b>Tell us about the type of EB services you offer:</b><br><i>Please tick all that apply and provide details</i> | <input type="checkbox"/> Hospital <input type="checkbox"/> Community <input type="checkbox"/> Home service <input type="checkbox"/> Other (please specify) |

\* For the purposes of this document, a caregiver indicates a non-professional. If you are a carer in a professional capacity, please tick the 'Professional carer' option in Group A.

### Psychosocial Guidelines: Appendix 3

| <p><b>Please tell us who works with EB patients at your institute:</b></p> <p><i>Please tick all that apply and circle the number of relevant people</i></p>                                                                                               | <table border="0"> <tr> <td><input type="checkbox"/> Consultant</td> <td>1</td> <td>2</td> <td>3</td> <td>4+</td> </tr> <tr> <td><input type="checkbox"/> Dermatologist</td> <td>1</td> <td>2</td> <td>3</td> <td>4+</td> </tr> <tr> <td><input type="checkbox"/> Surgeon</td> <td>1</td> <td>2</td> <td>3</td> <td>4+</td> </tr> <tr> <td><input type="checkbox"/> Nurse (specialist)</td> <td>1</td> <td>2</td> <td>3</td> <td>4+</td> </tr> <tr> <td><input type="checkbox"/> Psychologist, psychotherapist</td> <td>1</td> <td>2</td> <td>3</td> <td>4+</td> </tr> <tr> <td><input type="checkbox"/> Dietician, nutritionist</td> <td>1</td> <td>2</td> <td>3</td> <td>4+</td> </tr> <tr> <td><input type="checkbox"/> Dentist</td> <td>1</td> <td>2</td> <td>3</td> <td>4+</td> </tr> <tr> <td><input type="checkbox"/> Physiotherapist</td> <td>1</td> <td>2</td> <td>3</td> <td>4+</td> </tr> <tr> <td><input type="checkbox"/> Podiatrist</td> <td>1</td> <td>2</td> <td>3</td> <td>4+</td> </tr> <tr> <td><input type="checkbox"/> Occupational therapist, hand therapist</td> <td>1</td> <td>2</td> <td>3</td> <td>4+</td> </tr> <tr> <td><input type="checkbox"/> Social worker/social support</td> <td>1</td> <td>2</td> <td>3</td> <td>4+</td> </tr> <tr> <td><input type="checkbox"/> Other (please specify)</td> <td>1</td> <td>2</td> <td>3</td> <td>4+</td> </tr> </table> | <input type="checkbox"/> Consultant  | 1           | 2           | 3                                 | 4+                       | <input type="checkbox"/> Dermatologist | 1                                             | 2    | 3 | 4+ | <input type="checkbox"/> Surgeon | 1      | 2                                       | 3 | 4+ | <input type="checkbox"/> Nurse (specialist) | 1 | 2 | 3                                        | 4+          | <input type="checkbox"/> Psychologist, psychotherapist | 1 | 2 | 3 | 4+                                         | <input type="checkbox"/> Dietician, nutritionist | 1                        | 2                        | 3 | 4+ | <input type="checkbox"/> Dentist              | 1 | 2 | 3                        | 4+                       | <input type="checkbox"/> Physiotherapist | 1                                     | 2 | 3 | 4+ | <input type="checkbox"/> Podiatrist | 1 | 2                                               | 3 | 4+ | <input type="checkbox"/> Occupational therapist, hand therapist | 1 | 2 | 3 | 4+ | <input type="checkbox"/> Social worker/social support | 1 | 2 | 3 | 4+ | <input type="checkbox"/> Other (please specify) | 1 | 2 | 3 | 4+ |
|------------------------------------------------------------------------------------------------------------------------------------------------------------------------------------------------------------------------------------------------------------|---------------------------------------------------------------------------------------------------------------------------------------------------------------------------------------------------------------------------------------------------------------------------------------------------------------------------------------------------------------------------------------------------------------------------------------------------------------------------------------------------------------------------------------------------------------------------------------------------------------------------------------------------------------------------------------------------------------------------------------------------------------------------------------------------------------------------------------------------------------------------------------------------------------------------------------------------------------------------------------------------------------------------------------------------------------------------------------------------------------------------------------------------------------------------------------------------------------------------------------------------------------------------------------------------------------------------------------------------------------------------------------------|--------------------------------------|-------------|-------------|-----------------------------------|--------------------------|----------------------------------------|-----------------------------------------------|------|---|----|----------------------------------|--------|-----------------------------------------|---|----|---------------------------------------------|---|---|------------------------------------------|-------------|--------------------------------------------------------|---|---|---|--------------------------------------------|--------------------------------------------------|--------------------------|--------------------------|---|----|-----------------------------------------------|---|---|--------------------------|--------------------------|------------------------------------------|---------------------------------------|---|---|----|-------------------------------------|---|-------------------------------------------------|---|----|-----------------------------------------------------------------|---|---|---|----|-------------------------------------------------------|---|---|---|----|-------------------------------------------------|---|---|---|----|
| <input type="checkbox"/> Consultant                                                                                                                                                                                                                        | 1                                                                                                                                                                                                                                                                                                                                                                                                                                                                                                                                                                                                                                                                                                                                                                                                                                                                                                                                                                                                                                                                                                                                                                                                                                                                                                                                                                                           | 2                                    | 3           | 4+          |                                   |                          |                                        |                                               |      |   |    |                                  |        |                                         |   |    |                                             |   |   |                                          |             |                                                        |   |   |   |                                            |                                                  |                          |                          |   |    |                                               |   |   |                          |                          |                                          |                                       |   |   |    |                                     |   |                                                 |   |    |                                                                 |   |   |   |    |                                                       |   |   |   |    |                                                 |   |   |   |    |
| <input type="checkbox"/> Dermatologist                                                                                                                                                                                                                     | 1                                                                                                                                                                                                                                                                                                                                                                                                                                                                                                                                                                                                                                                                                                                                                                                                                                                                                                                                                                                                                                                                                                                                                                                                                                                                                                                                                                                           | 2                                    | 3           | 4+          |                                   |                          |                                        |                                               |      |   |    |                                  |        |                                         |   |    |                                             |   |   |                                          |             |                                                        |   |   |   |                                            |                                                  |                          |                          |   |    |                                               |   |   |                          |                          |                                          |                                       |   |   |    |                                     |   |                                                 |   |    |                                                                 |   |   |   |    |                                                       |   |   |   |    |                                                 |   |   |   |    |
| <input type="checkbox"/> Surgeon                                                                                                                                                                                                                           | 1                                                                                                                                                                                                                                                                                                                                                                                                                                                                                                                                                                                                                                                                                                                                                                                                                                                                                                                                                                                                                                                                                                                                                                                                                                                                                                                                                                                           | 2                                    | 3           | 4+          |                                   |                          |                                        |                                               |      |   |    |                                  |        |                                         |   |    |                                             |   |   |                                          |             |                                                        |   |   |   |                                            |                                                  |                          |                          |   |    |                                               |   |   |                          |                          |                                          |                                       |   |   |    |                                     |   |                                                 |   |    |                                                                 |   |   |   |    |                                                       |   |   |   |    |                                                 |   |   |   |    |
| <input type="checkbox"/> Nurse (specialist)                                                                                                                                                                                                                | 1                                                                                                                                                                                                                                                                                                                                                                                                                                                                                                                                                                                                                                                                                                                                                                                                                                                                                                                                                                                                                                                                                                                                                                                                                                                                                                                                                                                           | 2                                    | 3           | 4+          |                                   |                          |                                        |                                               |      |   |    |                                  |        |                                         |   |    |                                             |   |   |                                          |             |                                                        |   |   |   |                                            |                                                  |                          |                          |   |    |                                               |   |   |                          |                          |                                          |                                       |   |   |    |                                     |   |                                                 |   |    |                                                                 |   |   |   |    |                                                       |   |   |   |    |                                                 |   |   |   |    |
| <input type="checkbox"/> Psychologist, psychotherapist                                                                                                                                                                                                     | 1                                                                                                                                                                                                                                                                                                                                                                                                                                                                                                                                                                                                                                                                                                                                                                                                                                                                                                                                                                                                                                                                                                                                                                                                                                                                                                                                                                                           | 2                                    | 3           | 4+          |                                   |                          |                                        |                                               |      |   |    |                                  |        |                                         |   |    |                                             |   |   |                                          |             |                                                        |   |   |   |                                            |                                                  |                          |                          |   |    |                                               |   |   |                          |                          |                                          |                                       |   |   |    |                                     |   |                                                 |   |    |                                                                 |   |   |   |    |                                                       |   |   |   |    |                                                 |   |   |   |    |
| <input type="checkbox"/> Dietician, nutritionist                                                                                                                                                                                                           | 1                                                                                                                                                                                                                                                                                                                                                                                                                                                                                                                                                                                                                                                                                                                                                                                                                                                                                                                                                                                                                                                                                                                                                                                                                                                                                                                                                                                           | 2                                    | 3           | 4+          |                                   |                          |                                        |                                               |      |   |    |                                  |        |                                         |   |    |                                             |   |   |                                          |             |                                                        |   |   |   |                                            |                                                  |                          |                          |   |    |                                               |   |   |                          |                          |                                          |                                       |   |   |    |                                     |   |                                                 |   |    |                                                                 |   |   |   |    |                                                       |   |   |   |    |                                                 |   |   |   |    |
| <input type="checkbox"/> Dentist                                                                                                                                                                                                                           | 1                                                                                                                                                                                                                                                                                                                                                                                                                                                                                                                                                                                                                                                                                                                                                                                                                                                                                                                                                                                                                                                                                                                                                                                                                                                                                                                                                                                           | 2                                    | 3           | 4+          |                                   |                          |                                        |                                               |      |   |    |                                  |        |                                         |   |    |                                             |   |   |                                          |             |                                                        |   |   |   |                                            |                                                  |                          |                          |   |    |                                               |   |   |                          |                          |                                          |                                       |   |   |    |                                     |   |                                                 |   |    |                                                                 |   |   |   |    |                                                       |   |   |   |    |                                                 |   |   |   |    |
| <input type="checkbox"/> Physiotherapist                                                                                                                                                                                                                   | 1                                                                                                                                                                                                                                                                                                                                                                                                                                                                                                                                                                                                                                                                                                                                                                                                                                                                                                                                                                                                                                                                                                                                                                                                                                                                                                                                                                                           | 2                                    | 3           | 4+          |                                   |                          |                                        |                                               |      |   |    |                                  |        |                                         |   |    |                                             |   |   |                                          |             |                                                        |   |   |   |                                            |                                                  |                          |                          |   |    |                                               |   |   |                          |                          |                                          |                                       |   |   |    |                                     |   |                                                 |   |    |                                                                 |   |   |   |    |                                                       |   |   |   |    |                                                 |   |   |   |    |
| <input type="checkbox"/> Podiatrist                                                                                                                                                                                                                        | 1                                                                                                                                                                                                                                                                                                                                                                                                                                                                                                                                                                                                                                                                                                                                                                                                                                                                                                                                                                                                                                                                                                                                                                                                                                                                                                                                                                                           | 2                                    | 3           | 4+          |                                   |                          |                                        |                                               |      |   |    |                                  |        |                                         |   |    |                                             |   |   |                                          |             |                                                        |   |   |   |                                            |                                                  |                          |                          |   |    |                                               |   |   |                          |                          |                                          |                                       |   |   |    |                                     |   |                                                 |   |    |                                                                 |   |   |   |    |                                                       |   |   |   |    |                                                 |   |   |   |    |
| <input type="checkbox"/> Occupational therapist, hand therapist                                                                                                                                                                                            | 1                                                                                                                                                                                                                                                                                                                                                                                                                                                                                                                                                                                                                                                                                                                                                                                                                                                                                                                                                                                                                                                                                                                                                                                                                                                                                                                                                                                           | 2                                    | 3           | 4+          |                                   |                          |                                        |                                               |      |   |    |                                  |        |                                         |   |    |                                             |   |   |                                          |             |                                                        |   |   |   |                                            |                                                  |                          |                          |   |    |                                               |   |   |                          |                          |                                          |                                       |   |   |    |                                     |   |                                                 |   |    |                                                                 |   |   |   |    |                                                       |   |   |   |    |                                                 |   |   |   |    |
| <input type="checkbox"/> Social worker/social support                                                                                                                                                                                                      | 1                                                                                                                                                                                                                                                                                                                                                                                                                                                                                                                                                                                                                                                                                                                                                                                                                                                                                                                                                                                                                                                                                                                                                                                                                                                                                                                                                                                           | 2                                    | 3           | 4+          |                                   |                          |                                        |                                               |      |   |    |                                  |        |                                         |   |    |                                             |   |   |                                          |             |                                                        |   |   |   |                                            |                                                  |                          |                          |   |    |                                               |   |   |                          |                          |                                          |                                       |   |   |    |                                     |   |                                                 |   |    |                                                                 |   |   |   |    |                                                       |   |   |   |    |                                                 |   |   |   |    |
| <input type="checkbox"/> Other (please specify)                                                                                                                                                                                                            | 1                                                                                                                                                                                                                                                                                                                                                                                                                                                                                                                                                                                                                                                                                                                                                                                                                                                                                                                                                                                                                                                                                                                                                                                                                                                                                                                                                                                           | 2                                    | 3           | 4+          |                                   |                          |                                        |                                               |      |   |    |                                  |        |                                         |   |    |                                             |   |   |                                          |             |                                                        |   |   |   |                                            |                                                  |                          |                          |   |    |                                               |   |   |                          |                          |                                          |                                       |   |   |    |                                     |   |                                                 |   |    |                                                                 |   |   |   |    |                                                       |   |   |   |    |                                                 |   |   |   |    |
| <p><b>Please give a summary of the EB service(s) your institute provides:</b></p> <p><i>300 words maximum; please attach and use additional pages, if needed</i></p>                                                                                       |                                                                                                                                                                                                                                                                                                                                                                                                                                                                                                                                                                                                                                                                                                                                                                                                                                                                                                                                                                                                                                                                                                                                                                                                                                                                                                                                                                                             |                                      |             |             |                                   |                          |                                        |                                               |      |   |    |                                  |        |                                         |   |    |                                             |   |   |                                          |             |                                                        |   |   |   |                                            |                                                  |                          |                          |   |    |                                               |   |   |                          |                          |                                          |                                       |   |   |    |                                     |   |                                                 |   |    |                                                                 |   |   |   |    |                                                       |   |   |   |    |                                                 |   |   |   |    |
| <p><b>Target groups:</b></p> <p><i>Please tick all that apply and provide approximate numbers, where applicable</i></p>                                                                                                                                    | <table border="0"> <thead> <tr> <th><b>Living with EB (years of age)</b></th> <th><b>EBS</b></th> <th><b>JEB</b></th> <th><b>DDEB</b></th> <th><b>RDEB</b></th> <th><b>KS</b></th> </tr> </thead> <tbody> <tr> <td><input type="checkbox"/> Newborn and neonatal</td> <td></td> <td></td> <td></td> <td></td> <td></td> </tr> <tr> <td><input type="checkbox"/> Children (0-7)</td> <td></td> <td></td> <td></td> <td></td> <td></td> </tr> <tr> <td><input type="checkbox"/> Children (8-12)</td> <td></td> <td></td> <td></td> <td></td> <td></td> </tr> <tr> <td><input type="checkbox"/> Teenagers (12-18)</td> <td></td> <td></td> <td></td> <td></td> <td></td> </tr> <tr> <td><input type="checkbox"/> Young adults (18-25)</td> <td></td> <td></td> <td></td> <td></td> <td></td> </tr> <tr> <td><input type="checkbox"/> Adults (25+)</td> <td></td> <td></td> <td></td> <td></td> <td></td> </tr> <tr> <td><input type="checkbox"/> Other (please specify)</td> <td></td> <td></td> <td></td> <td></td> <td></td> </tr> </tbody> </table>                                                                                                                                                                                                                                                                                                                                         | <b>Living with EB (years of age)</b> | <b>EBS</b>  | <b>JEB</b>  | <b>DDEB</b>                       | <b>RDEB</b>              | <b>KS</b>                              | <input type="checkbox"/> Newborn and neonatal |      |   |    |                                  |        | <input type="checkbox"/> Children (0-7) |   |    |                                             |   |   | <input type="checkbox"/> Children (8-12) |             |                                                        |   |   |   | <input type="checkbox"/> Teenagers (12-18) |                                                  |                          |                          |   |    | <input type="checkbox"/> Young adults (18-25) |   |   |                          |                          |                                          | <input type="checkbox"/> Adults (25+) |   |   |    |                                     |   | <input type="checkbox"/> Other (please specify) |   |    |                                                                 |   |   |   |    |                                                       |   |   |   |    |                                                 |   |   |   |    |
| <b>Living with EB (years of age)</b>                                                                                                                                                                                                                       | <b>EBS</b>                                                                                                                                                                                                                                                                                                                                                                                                                                                                                                                                                                                                                                                                                                                                                                                                                                                                                                                                                                                                                                                                                                                                                                                                                                                                                                                                                                                  | <b>JEB</b>                           | <b>DDEB</b> | <b>RDEB</b> | <b>KS</b>                         |                          |                                        |                                               |      |   |    |                                  |        |                                         |   |    |                                             |   |   |                                          |             |                                                        |   |   |   |                                            |                                                  |                          |                          |   |    |                                               |   |   |                          |                          |                                          |                                       |   |   |    |                                     |   |                                                 |   |    |                                                                 |   |   |   |    |                                                       |   |   |   |    |                                                 |   |   |   |    |
| <input type="checkbox"/> Newborn and neonatal                                                                                                                                                                                                              |                                                                                                                                                                                                                                                                                                                                                                                                                                                                                                                                                                                                                                                                                                                                                                                                                                                                                                                                                                                                                                                                                                                                                                                                                                                                                                                                                                                             |                                      |             |             |                                   |                          |                                        |                                               |      |   |    |                                  |        |                                         |   |    |                                             |   |   |                                          |             |                                                        |   |   |   |                                            |                                                  |                          |                          |   |    |                                               |   |   |                          |                          |                                          |                                       |   |   |    |                                     |   |                                                 |   |    |                                                                 |   |   |   |    |                                                       |   |   |   |    |                                                 |   |   |   |    |
| <input type="checkbox"/> Children (0-7)                                                                                                                                                                                                                    |                                                                                                                                                                                                                                                                                                                                                                                                                                                                                                                                                                                                                                                                                                                                                                                                                                                                                                                                                                                                                                                                                                                                                                                                                                                                                                                                                                                             |                                      |             |             |                                   |                          |                                        |                                               |      |   |    |                                  |        |                                         |   |    |                                             |   |   |                                          |             |                                                        |   |   |   |                                            |                                                  |                          |                          |   |    |                                               |   |   |                          |                          |                                          |                                       |   |   |    |                                     |   |                                                 |   |    |                                                                 |   |   |   |    |                                                       |   |   |   |    |                                                 |   |   |   |    |
| <input type="checkbox"/> Children (8-12)                                                                                                                                                                                                                   |                                                                                                                                                                                                                                                                                                                                                                                                                                                                                                                                                                                                                                                                                                                                                                                                                                                                                                                                                                                                                                                                                                                                                                                                                                                                                                                                                                                             |                                      |             |             |                                   |                          |                                        |                                               |      |   |    |                                  |        |                                         |   |    |                                             |   |   |                                          |             |                                                        |   |   |   |                                            |                                                  |                          |                          |   |    |                                               |   |   |                          |                          |                                          |                                       |   |   |    |                                     |   |                                                 |   |    |                                                                 |   |   |   |    |                                                       |   |   |   |    |                                                 |   |   |   |    |
| <input type="checkbox"/> Teenagers (12-18)                                                                                                                                                                                                                 |                                                                                                                                                                                                                                                                                                                                                                                                                                                                                                                                                                                                                                                                                                                                                                                                                                                                                                                                                                                                                                                                                                                                                                                                                                                                                                                                                                                             |                                      |             |             |                                   |                          |                                        |                                               |      |   |    |                                  |        |                                         |   |    |                                             |   |   |                                          |             |                                                        |   |   |   |                                            |                                                  |                          |                          |   |    |                                               |   |   |                          |                          |                                          |                                       |   |   |    |                                     |   |                                                 |   |    |                                                                 |   |   |   |    |                                                       |   |   |   |    |                                                 |   |   |   |    |
| <input type="checkbox"/> Young adults (18-25)                                                                                                                                                                                                              |                                                                                                                                                                                                                                                                                                                                                                                                                                                                                                                                                                                                                                                                                                                                                                                                                                                                                                                                                                                                                                                                                                                                                                                                                                                                                                                                                                                             |                                      |             |             |                                   |                          |                                        |                                               |      |   |    |                                  |        |                                         |   |    |                                             |   |   |                                          |             |                                                        |   |   |   |                                            |                                                  |                          |                          |   |    |                                               |   |   |                          |                          |                                          |                                       |   |   |    |                                     |   |                                                 |   |    |                                                                 |   |   |   |    |                                                       |   |   |   |    |                                                 |   |   |   |    |
| <input type="checkbox"/> Adults (25+)                                                                                                                                                                                                                      |                                                                                                                                                                                                                                                                                                                                                                                                                                                                                                                                                                                                                                                                                                                                                                                                                                                                                                                                                                                                                                                                                                                                                                                                                                                                                                                                                                                             |                                      |             |             |                                   |                          |                                        |                                               |      |   |    |                                  |        |                                         |   |    |                                             |   |   |                                          |             |                                                        |   |   |   |                                            |                                                  |                          |                          |   |    |                                               |   |   |                          |                          |                                          |                                       |   |   |    |                                     |   |                                                 |   |    |                                                                 |   |   |   |    |                                                       |   |   |   |    |                                                 |   |   |   |    |
| <input type="checkbox"/> Other (please specify)                                                                                                                                                                                                            |                                                                                                                                                                                                                                                                                                                                                                                                                                                                                                                                                                                                                                                                                                                                                                                                                                                                                                                                                                                                                                                                                                                                                                                                                                                                                                                                                                                             |                                      |             |             |                                   |                          |                                        |                                               |      |   |    |                                  |        |                                         |   |    |                                             |   |   |                                          |             |                                                        |   |   |   |                                            |                                                  |                          |                          |   |    |                                               |   |   |                          |                          |                                          |                                       |   |   |    |                                     |   |                                                 |   |    |                                                                 |   |   |   |    |                                                       |   |   |   |    |                                                 |   |   |   |    |
| <p><b>Before reading the guideline, what information do you/your team already know about this clinical issue?</b></p> <p><i>Please circle the number you feel best reflects your experience and/or tick the most appropriate box, where applicable</i></p> | <p>Knowledge about this clinical issue:</p> <table border="0"> <tr> <td style="text-align: center;">1</td> <td style="text-align: center;">2</td> <td style="text-align: center;">3</td> <td style="text-align: center;">4</td> <td style="text-align: center;">5</td> <td></td> <td></td> </tr> <tr> <td style="text-align: center;">None</td> <td></td> <td></td> <td></td> <td style="text-align: center;">Expert</td> <td></td> <td></td> </tr> <tr> <td></td> <td></td> <td></td> <td></td> <td></td> <td style="text-align: center;"><b>*Yes</b></td> <td style="text-align: center;"><b>No</b></td> </tr> <tr> <td></td> <td></td> <td></td> <td></td> <td></td> <td style="text-align: center;"><input type="checkbox"/></td> <td style="text-align: center;"><input type="checkbox"/></td> </tr> <tr> <td></td> <td></td> <td></td> <td></td> <td></td> <td style="text-align: center;"><input type="checkbox"/></td> <td style="text-align: center;"><input type="checkbox"/></td> </tr> <tr> <td></td> <td></td> <td></td> <td></td> <td></td> <td colspan="2">* If yes, Please provide details:</td> </tr> </table>                                                                                                                                                                                                                                                             | 1                                    | 2           | 3           | 4                                 | 5                        |                                        |                                               | None |   |    |                                  | Expert |                                         |   |    |                                             |   |   |                                          | <b>*Yes</b> | <b>No</b>                                              |   |   |   |                                            |                                                  | <input type="checkbox"/> | <input type="checkbox"/> |   |    |                                               |   |   | <input type="checkbox"/> | <input type="checkbox"/> |                                          |                                       |   |   |    | * If yes, Please provide details:   |   |                                                 |   |    |                                                                 |   |   |   |    |                                                       |   |   |   |    |                                                 |   |   |   |    |
| 1                                                                                                                                                                                                                                                          | 2                                                                                                                                                                                                                                                                                                                                                                                                                                                                                                                                                                                                                                                                                                                                                                                                                                                                                                                                                                                                                                                                                                                                                                                                                                                                                                                                                                                           | 3                                    | 4           | 5           |                                   |                          |                                        |                                               |      |   |    |                                  |        |                                         |   |    |                                             |   |   |                                          |             |                                                        |   |   |   |                                            |                                                  |                          |                          |   |    |                                               |   |   |                          |                          |                                          |                                       |   |   |    |                                     |   |                                                 |   |    |                                                                 |   |   |   |    |                                                       |   |   |   |    |                                                 |   |   |   |    |
| None                                                                                                                                                                                                                                                       |                                                                                                                                                                                                                                                                                                                                                                                                                                                                                                                                                                                                                                                                                                                                                                                                                                                                                                                                                                                                                                                                                                                                                                                                                                                                                                                                                                                             |                                      |             | Expert      |                                   |                          |                                        |                                               |      |   |    |                                  |        |                                         |   |    |                                             |   |   |                                          |             |                                                        |   |   |   |                                            |                                                  |                          |                          |   |    |                                               |   |   |                          |                          |                                          |                                       |   |   |    |                                     |   |                                                 |   |    |                                                                 |   |   |   |    |                                                       |   |   |   |    |                                                 |   |   |   |    |
|                                                                                                                                                                                                                                                            |                                                                                                                                                                                                                                                                                                                                                                                                                                                                                                                                                                                                                                                                                                                                                                                                                                                                                                                                                                                                                                                                                                                                                                                                                                                                                                                                                                                             |                                      |             |             | <b>*Yes</b>                       | <b>No</b>                |                                        |                                               |      |   |    |                                  |        |                                         |   |    |                                             |   |   |                                          |             |                                                        |   |   |   |                                            |                                                  |                          |                          |   |    |                                               |   |   |                          |                          |                                          |                                       |   |   |    |                                     |   |                                                 |   |    |                                                                 |   |   |   |    |                                                       |   |   |   |    |                                                 |   |   |   |    |
|                                                                                                                                                                                                                                                            |                                                                                                                                                                                                                                                                                                                                                                                                                                                                                                                                                                                                                                                                                                                                                                                                                                                                                                                                                                                                                                                                                                                                                                                                                                                                                                                                                                                             |                                      |             |             | <input type="checkbox"/>          | <input type="checkbox"/> |                                        |                                               |      |   |    |                                  |        |                                         |   |    |                                             |   |   |                                          |             |                                                        |   |   |   |                                            |                                                  |                          |                          |   |    |                                               |   |   |                          |                          |                                          |                                       |   |   |    |                                     |   |                                                 |   |    |                                                                 |   |   |   |    |                                                       |   |   |   |    |                                                 |   |   |   |    |
|                                                                                                                                                                                                                                                            |                                                                                                                                                                                                                                                                                                                                                                                                                                                                                                                                                                                                                                                                                                                                                                                                                                                                                                                                                                                                                                                                                                                                                                                                                                                                                                                                                                                             |                                      |             |             | <input type="checkbox"/>          | <input type="checkbox"/> |                                        |                                               |      |   |    |                                  |        |                                         |   |    |                                             |   |   |                                          |             |                                                        |   |   |   |                                            |                                                  |                          |                          |   |    |                                               |   |   |                          |                          |                                          |                                       |   |   |    |                                     |   |                                                 |   |    |                                                                 |   |   |   |    |                                                       |   |   |   |    |                                                 |   |   |   |    |
|                                                                                                                                                                                                                                                            |                                                                                                                                                                                                                                                                                                                                                                                                                                                                                                                                                                                                                                                                                                                                                                                                                                                                                                                                                                                                                                                                                                                                                                                                                                                                                                                                                                                             |                                      |             |             | * If yes, Please provide details: |                          |                                        |                                               |      |   |    |                                  |        |                                         |   |    |                                             |   |   |                                          |             |                                                        |   |   |   |                                            |                                                  |                          |                          |   |    |                                               |   |   |                          |                          |                                          |                                       |   |   |    |                                     |   |                                                 |   |    |                                                                 |   |   |   |    |                                                       |   |   |   |    |                                                 |   |   |   |    |



### Psychosocial Guidelines: Appendix 3

|                  |                                                                                                                                                                                                                                                                                                                                                                                                                              |          |          |          |          |          |                  |        |         |        |       |
|------------------|------------------------------------------------------------------------------------------------------------------------------------------------------------------------------------------------------------------------------------------------------------------------------------------------------------------------------------------------------------------------------------------------------------------------------|----------|----------|----------|----------|----------|------------------|--------|---------|--------|-------|
|                  | <p>How often do you (your family member/friend) experience this problem?</p> <table style="width: 100%; text-align: center;"> <tr> <td><b>1</b></td> <td><b>2</b></td> <td><b>3</b></td> <td><b>4</b></td> <td><b>5</b></td> </tr> <tr> <td>Less than yearly</td> <td>Yearly</td> <td>Monthly</td> <td>Weekly</td> <td>Daily</td> </tr> </table> <p>How do you (your family member/friend) normally manage this problem?</p> | <b>1</b> | <b>2</b> | <b>3</b> | <b>4</b> | <b>5</b> | Less than yearly | Yearly | Monthly | Weekly | Daily |
| <b>1</b>         | <b>2</b>                                                                                                                                                                                                                                                                                                                                                                                                                     | <b>3</b> | <b>4</b> | <b>5</b> |          |          |                  |        |         |        |       |
| Less than yearly | Yearly                                                                                                                                                                                                                                                                                                                                                                                                                       | Monthly  | Weekly   | Daily    |          |          |                  |        |         |        |       |

DEBRA International (DI) would like to further contact respondents to this guideline survey a year later for post evaluation measurement. The purpose of this additional survey is to evaluate the use of the guideline after its principles have been applied in practice.

Declaration

I understand that the information I provide will be used for data collection and guideline evaluation purposes only.

I understand that all data collected through these surveys will be anonymised and will not become identifiable in the evaluation process.

I understand that if DI would like to contact me in the future, they will only be able to do so for the purposes of being asked to complete the post evaluation survey, unless consent has otherwise been obtained for additional purposes.

I understand I am under no obligation to complete the post evaluation survey once I receive it, and that I am able to change or withdraw my consent at any time by notifying DI ([office@debra-international.org](mailto:office@debra-international.org)). I understand if consent is withdrawn, DI will destroy all identifiable records (i.e. contact details provided with the pre or post evaluation surveys).

I understand I have the right to ask to see any information and records held about me by DI.

I give my consent for DI to contact me after one year with a post evaluation guideline survey.

For more details on how DI uses your information, please visit [www.debra-international.org](http://www.debra-international.org).

| Contact Details |  |      |  |
|-----------------|--|------|--|
| Full name       |  |      |  |
| Signature       |  | Date |  |
| Email           |  |      |  |
